# Supplementary material for: System analysis of the regulation of the immune response by CD147 and FOXC1 in cancer cell lines
Source: PubMed Central journal article supplement (PMC5849184; doi:10.18632/oncotarget.24161), 2018-01-11
Supplement: oncotarget-09-12918-s001.pdf [file oncotarget-09-12918-s001.pdf]

# System analysis of the regulation of the immune response by CD147 and FOXC1 in cancer cell lines

## SUPPLEMENTARY MATERIALS

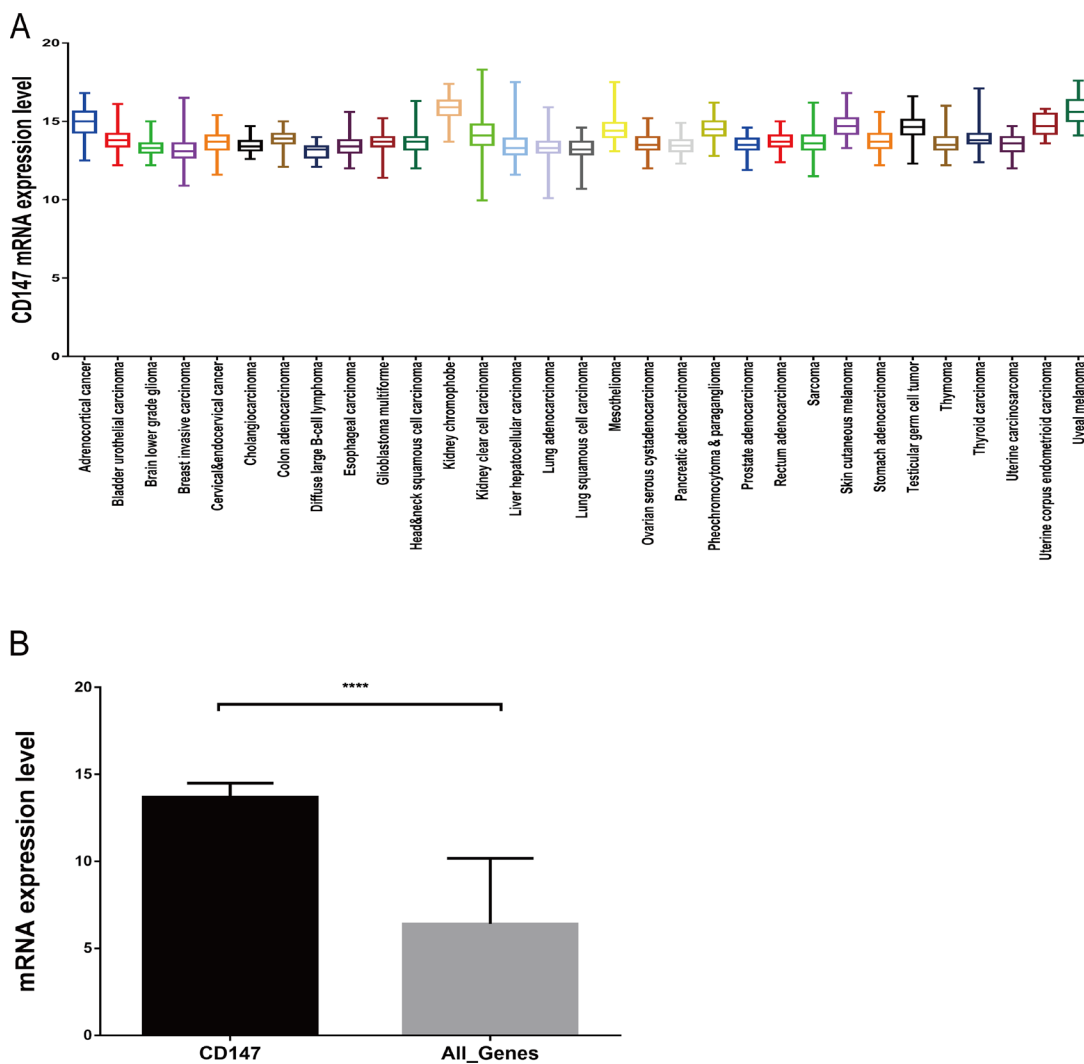

**Supplementary Figure 1: CD147 is a highly expressed gene in cancer tissues from patients.** (A) The mRNA expression profile of CD147 in the pan-cancer panel. (B) Comparison of the mRNA expression levels of CD147 and All\_Genes in pan-cancer data. \*\*\*\* $P < 0.0001$ , as assessed by Student's *t*-test.

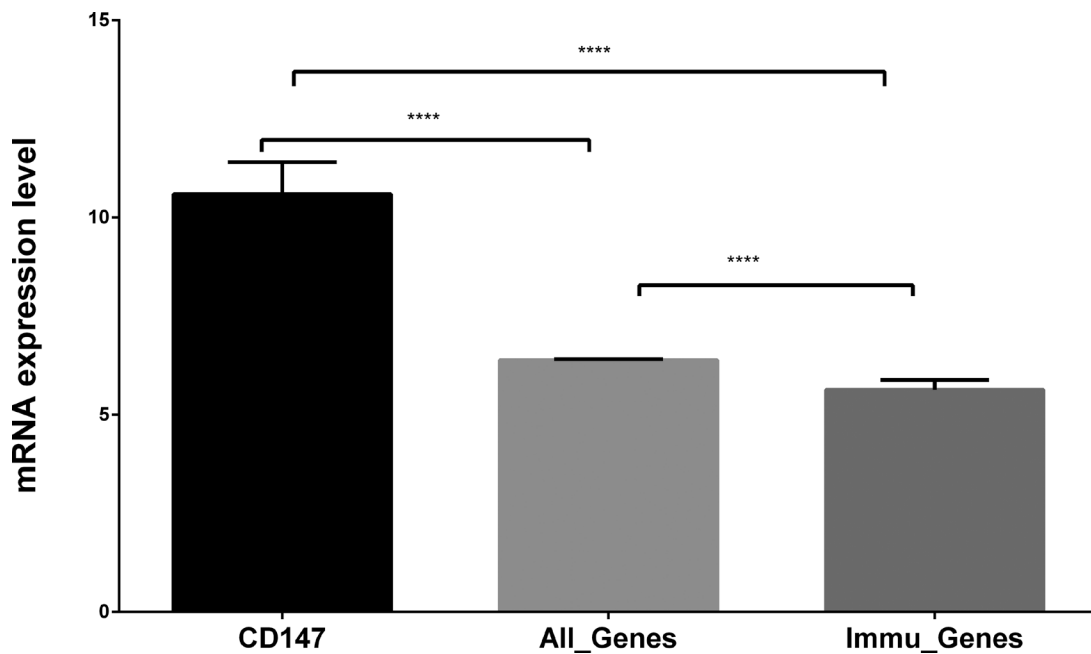

**Supplementary Figure 2: The differential mRNA expression among CD147, All\_genes and immu\_genes in cancer cell lines from CCLE datasets. \*\*\*\* $P < 0.0001$ .**

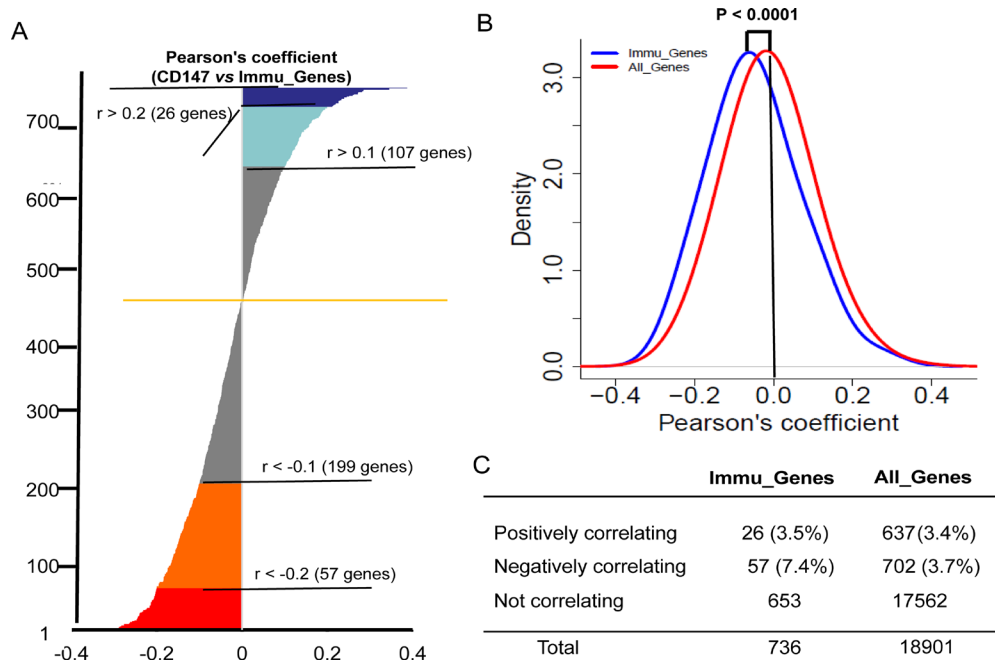

**Supplementary Figure 3: Coexpression of immu\_genes with CD147 across the CCLE. (A)** Waterfall plot showing Pearson's coefficients for the correlation between the CD147 gene intensity in the CCLE and intensities of all Immu\_Genes from 15 curated, immunerelated KEGG pathways. Pearson's correlation coefficients were sorted from the highest positive (top) to lowest negative (bottom). The color codes are as follows: blue = Pearson's  $r > 0.2$  (26 genes, two-tailed  $P < 0.0001$ ), turquoise = Pearson's  $r > 0.1$  (107 genes, two-tailed  $P < 0.0001$ ), gray = non-significant correlations, orange = Pearson's  $r < -0.1$  (199 genes, two-tailed  $P < 0.0001$ ) and red = Pearson's  $r < -0.2$  (57 genes, two-tailed  $P < 0.0001$ ). **(B)** Density plot showing the distribution of Pearson's correlations of Immu\_Genes (blue) and All\_Genes (red) with CD147. Immu\_Genes showed a significant shift toward the left, indicating an excess of negative correlations with CD147 compared with the overall genome ( $P < 0.0001$ , two-tailed unpaired t-test). Y-axis: density-estimated values using a Gaussian kernel. **(C)** Contingency table showing numbers and percents of Immu\_Genes or all the genes that correlate positively or negatively or do not correlate with CD147.

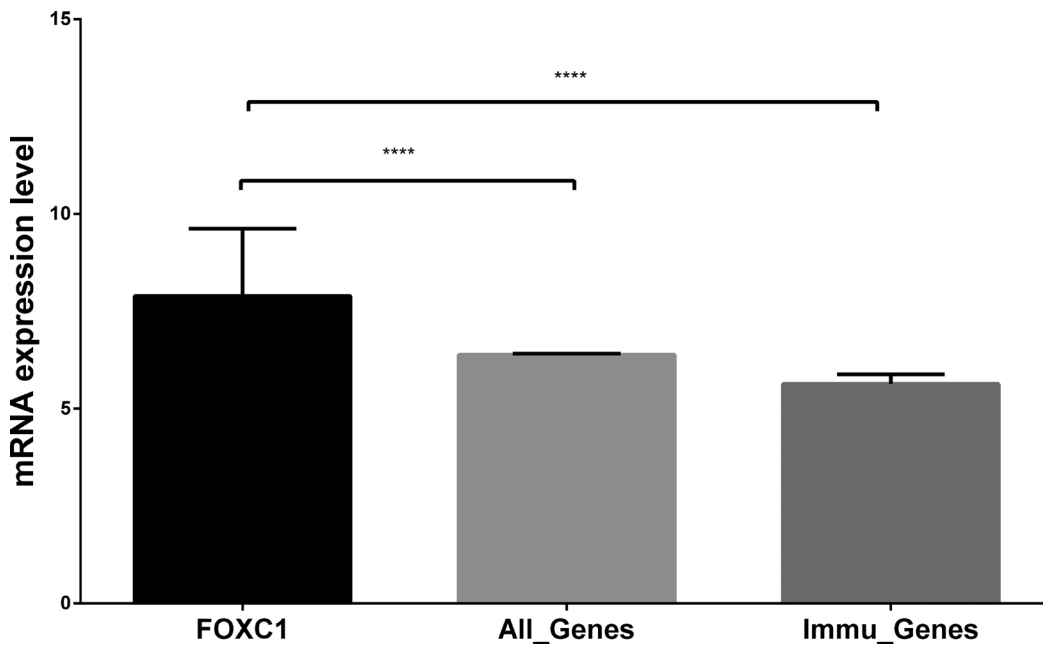

Supplementary Figure 4: The differential mRNA expression among FOXC1, All\_genes and immu\_genes in cancer cell lines from CCLE datasets. \*\*\*\* $P < 0.0001$ .

Supplementary Table 1: Four immune response-related genes negatively correlated with CD147 in CCLE

| Term    | r     | P        | Adjusted P-value |
|---------|-------|----------|------------------|
| CD80    | -0.15 | 5.80E-07 | 3.35E-06         |
| CD40LG  | -0.15 | 8.83E-07 | 5.35E-06         |
| CD86    | -0.15 | 9.25E-07 | 5.57E-06         |
| TNFRSF8 | -0.14 | 1.18E-05 | 5.51E-05         |

Supplementary Table 2: The transcription factors enriched by Enrichr based on 1,339 genes that coexpressed with CD147. See\_Supplementary\_Table 2

Supplementary Table 3: The transcription factors enriched by Enrichr based on the 702 genes that negatively correlated with CD147. See\_Supplementary\_Table 3

Supplementary Table 4: The transcription factors enriched by Enrichr based on the Immu\_Genes from InnateDB and IRIS databases. See\_Supplementary\_Table 4

**Supplementary Table 5: Gene-specific primers for quantitative RT-PCR**

| Target gene | Forward primer (5' to 3') | Reverse primer (5' to 3') |
|-------------|---------------------------|---------------------------|
| CD147       | ACTCCTCACCTGCTCCTTGA      | GCCTCCATGTTTCAGGTTCTC     |
| CD80        | AAACTCGCATCTACTGGCAAA     | GGTTCTTGTACTIONCGGGCCATA  |
| CD40LG      | ACTTGGTAACCCTGGAAA        | GGCTGGCTATAAATGGAG        |
| CD86        | CTCTGGTGCTGCTCCTCT        | GGGTCCAACACTGTCCGAAT      |
| TNFRSF8     | CAGGATATGGCTGAGAAGGAC     | GACCACCACAACCAACACC       |
| GAPDH       | TGATGACATCAAGAAGGTGGTGAAG | TCCTTGGAGGCCATGTGGGCCAT   |

**Supplementary Table 6: RNAi oligonucleotides for target gene silencing**

| Target gene | RNAi oligonucleotides (5' to 3') |
|-------------|----------------------------------|
| si-CD147    | GTACAAGATCACTGACTCT              |
| si-NC       | UUCUCCGAACGUGUCACGUTT            |

**Supplementary Table 7: The GO biology processes enriched with genes that negatively correlate with CD147 in cancer cell lines. See Supplementary Table 7**
